# Supplementary material for: Isolation, genome analysis and comparison of a novel parainfluenza virus 5 from a Siberian tiger (Panthera tigris)
Source: Frontiers journal article supplement (doi:10.3389/fvets.2024.1356378), 2024-04-05
Supplement: Table_1.XLSX [file Table_1.XLSX]

## Sheet: 3条 ori
Supplementary Table 1: Comparation of the mutations of nucleotide and amino acid of PIV5 strains ZJQ-221, SR and SZ2
NO.	Area	Nucleotide sequence					Amino acid sequence
		Nucleotide location	strains				Sense mutation location	strains
			ZJQ-221	SR	SZ2			ZJQ-221	SR	SZ2
1	3‘ leader	7	G	G	A		-
2		14	U	U	C		-
3		25	C	U	U		-
4		26	G	U	U		-
5		35	C	C	A		-
6		36	A	U	A		-
7		41	C	C	U		-
8		42	A	C	A		-
9		48	G	G	U		-
10		61	C	C	U		-
11		72	G	G	C		-
12		77	C	A	C		-
13	NP	474	G	A	A		108	Gly	Glu	Glu
14		592	U	U	C		-
15		703	G	G	A		-
16		715	U	U	C		-
17		745	G	A	A		-
18		754	G	G	A		-
19		800	A	A	C		-
20		804	U	U	C		218	Ile	Ile	Thr
21		817	G	A	A		-
22		823	A	A	G		-
23		844	U	C	U		-
24		1119	A	G	A		323	Asp	Gly	Asp
25		1158	C	U	C		336	Ala	Val	Ala
26		1251	A	C	A		367	Glu	Ala	Glu
27		1409	A	A	G		420	Ile	Ile	Val
28		1513	C	C	U		-
29		1608	U	U	G		486	Ile	Ile	Ser
30	NP-V/P interval	1701	U	U	A		-
31		1727	U	U	C		-
32		1817	C	C	U		-
33		1818	G	A	G		-
34		1829	U	U	C		-
35		1831	A	A	G		-
36	V/P	1886	A	G	A		13	Ile	Val	Ile
37		1930	U	U	A		27	Phe	Phe	Leu
38		2068	C	C	U		-
39		2124	C	U	C		92	Thr	Met	Thr
40		2242	A	A	G		-
41		2252	U	U	A		135	Phe	Phe	Ile
42		2263	A	A	G		-
43		2316	A	A	G		156	Asn	Asn	Ser
44		2319	C	C	U		157	Ser	Ser	Phe
45		2350	C	U	C		-
46		2370	A	G	A		174	Glu	Gly	Glu
47	V/P-M interval	2531	U	U	C		-
48		2621	U	C	U		-
49		2629	A	A	C		-
50		2730	A	A	G		-
51		3127	C	C	U		-
52		3131	C	C	U		-
53	M	3188	A	A	U		-
54		3216	C	C	A		26	Arg	Arg	Ser
55		3236	U	U	C		-
56		3314	U	U	C		-
57		3344	A	A	G		-
58		3370	A	A	U		77	His	His	Leu
59		3464	U	A	U		108	Ser	Arg	Ser
60		3703	G	G	A		188	Gly	Gly	Asp
61		3850	A	G	A		237	His	Arg	His
62		3860	U	U	C		-
63		4076	G	G	A		-
64		4175	A	C	A		-
65		4188	U	U	C		350	Ser	Ser	Pro
66		4221	U	C	U		361	Trp	Arg	Trp
67		4241	C	C	U		-
68		4253	C	C	U		-
69		4264	C	C	A		375	Ala	Ala	Glu
70	M-F interval	4281	C	C	U		-
71		4283	C	C	U		-
72		4292	C	C	U		-
73		4417	C	C	U		-
74	F	4586	U	U	C		-
75		4767	C	C	A		80	Leu	Leu	Ile
76		5087	A	A	G		-
77		5213	A	A	G		-
78		5237	C	A	C		-
79		5267	G	G	A		-
80		5364	G	G	A		279	Ala	Ala	Thr
81		5545	G	G	A		339	Arg	Arg	Gln
82		5646	G	G	A		373	Asp	Asp	Asn
83		5735	A	U	A		-
84		5863	C	C	A		445	Ala	Ala	Asp
85		6126	C	C	U		533	His	His	Tyr
86	F-SH interval	6219	A	A	C		-
87	SH	6333	A	A	C		11	Lys	Lys	Gln
88		6339	G	G	A		13	Ala	Ala	Thr
89		6341	U	U	C
90		6354	G	G	A		18	Gly	Gly	Arg
91		6391	C	C	U		30	Pro	Pro	Leu
92		6418	U	U	C		39	Leu	Leu	Pro
93	SH-HN interval	6457	G	A	A
94		6516	G	G	U
95	HN	6627	C	U	U		15	Ser	Leu	Leu
96		6665	U	U	C		-
97		6693	A	A	G		37	Glu	Glu	Gly
98		6923	G	G	A		114	Gly	Gly	Ser
99		7000	G	G	U		139	Lys	Lys	Asn
100		7059	A	A	G		159	Glu	Glu	Gly
101		7211	C	C	U		210	Leu	Leu	Phe
102		7228	U	U	C		-
103		7306	C	C	U		-
104		7321	A	A	G		-
105		7324	A	G	G		-
106		7331	G	G	A		250	Asp	Asp	Asn
107		7339	U	U	C		-
108		7415	C	C	U		278	Pro	Pro	Ser
109		7446	C	C	A		288	Thr	Thr	Asn
110		7486	A	A	G		-
111		7504	C	C	U		-
112		7846	C	A	A		-
113		7922	A	A	G		447	Ser	Ser	Asp
114		7923	G	G	A
115		7942	A	U	A		453	Arg	Ser	Arg
116		7962	A	A	C		460	Lys	Lys	Thr
117		8035	C	C	U		-
118		8054	G	G	U		491	Ala	Ala	Ser
119		8089	C	C	U		-
120		8141	G	G	A		520	Glu	Glu	Lys
121	L	8572	A	A	U		-
122		8593	C	C	U		-
123		8740	A	A	G		-
124		8795	A	A	G		128	Thr	Thr	Ala
125		9256	G	G	A		-
126		9295	G	A	A		-
127		9423	C	C	U		337	Ser	Ser	Leu
128		9439	C	C	U		-
129		9529	C	C	U		-
130		9562	C	C	U		-
131		9868	U	U	C		-
132		10150	U	U	C		-
133		10270	A	A	G		-
134		10277	C	C	A		-
135		10405	C	C	A		-
136		10619	A	G	A		736	Arg	Gly	Arg
137		10639	A	A	G		-
138		10717	U	C	U		-
139		10723	G	G	A		-
140		11002	U	U	C		-
141		11107	A	A	C		898	Lys	Lys	Asn
142		11210	C	C	U		-
143		11291	G	G	U		960	Ala	Ala	Ser
144		11375	A	A	G		988	Asn	Asn	Asp
145		11665	A	A	G		-
146		11674	U	U	G		1087	Ser	Ser	Arg
147		11800	A	A	G		-
148		11872	G	G	A		-
149		11451	A	A	G		-
150		11454	U	U	C		-
151		12601	G	G	A		-
152		12676	U	U	C		-
153		12731	C	U	U		-
154		12760	U	U	C		-
155		12787	U	U	C		-
156		12841	U	U	C		-
157		13153	C	C	A		-
158		13223	G	G	A		1604	Asp	Asp	Asn
159		13501	C	C	U		-
160		13576	U	U	C		-
161		13690	C	C	U		-
162		13737	G	C	G		1775	Arg	Pro	Arg
163		13786	U	C	C		-
164		14056	U	U	C
165		14349	G	G	A		1979	Gly	Gly	Asp
166		14542	R	G	G		-
167		14558	G	G	A		2049	Asp	Asp	Asn
168		14767	C	C	U		-
169		14809	A	A	C		2132	Leu	Leu	Phe
170		15040	G	G	A		-
171		15052	A	A	G		-
172		15098	G	G	A		2229	Val	Val	Met
173		15100	A	A	G
174		15112	A	A	G		-
175		15114	C	C	U		2234	Ser	Ser	Leu
176		15128	G	G	A		2239	Asp	Asp	Asn
